# Supplementary material
Source: PubMed Central journal article supplement (PMC9426653)
Supplement: NIHMS1825369-supplement-Electronic_Supplemental_Material.pdf [file NIHMS1825369-supplement-Electronic_Supplemental_Material.pdf]

## Appendix I.

Working with the informationist KL, we conducted a search of peer-reviewed literature, consisting of the databases PubMed, Embase, Web of Science, Scopus, and Global health Library via Ovid, with search strategy per database outlined below. Searches were performed on June 25<sup>th</sup>, 2018 spanning literature published between January 1<sup>st</sup>, 2008 and 2018, with an updated search for literature published through December 31<sup>st</sup>, 2019 conducted on May 19<sup>th</sup>, 2020.

### PubMed

("hiv"[mesh] OR "hiv-1"[mesh] OR "hiv-2"[mesh] OR "hiv infections"[mesh] OR "aids associated lentivirus"[tiab] OR "aids associated retrovirus"[tiab] OR "aids associated virus"[tiab] OR "aids related virus"[tiab] OR "AIDS virus"[tiab] OR "hiv"[tiab] OR "hiv-1"[tiab] OR "hiv-2"[tiab] OR "htlv-iii"[tiab] OR "human immune deficiency virus"[tiab] OR "human immune deficiency viruses"[tiab] OR "human immuno deficiency virus"[tiab] OR "human immuno deficiency viruses"[tiab] OR "human immunodeficiency virus 1"[tiab] OR "human immunodeficiency virus 2"[tiab] OR "human immunodeficiency virus"[tiab] OR "human immunodeficiency viruses"[tiab] OR "human t cell leukemia virus type iii"[tiab] OR "human t cell leukaemia virus type iii"[tiab] OR "human t cell lymphotropic virus type iii"[tiab] OR "human t lymphotropic virus type iii"[tiab] OR "human t-cell leukemia virus type iii"[tiab] OR "human t-cell lymphotropic virus type iii"[tiab] OR "human t-lymphotropic virus type iii"[tiab] OR "immunodeficiency associated virus"[tiab] OR "lymphadenopathy associated retrovirus"[tiab] OR "lymphadenopathy associated virus"[tiab]) AND ("delivery of health care"[mesh:noexp] OR "medication adherence"[mesh] OR "patient compliance"[mesh] OR "patient education as topic"[mesh] OR "patient medication knowledge"[mesh] OR "referral and consultation"[mesh] OR "treatment adherence and compliance"[mesh] OR "adherence to therapy"[tiab] OR "adherence to treatment"[tiab] OR "compliance to therapy"[tiab] OR "compliance to treatment"[tiab] OR "delivery of care"[tiab] OR "delivery of health care"[tiab] OR "delivery of healthcare"[tiab] OR "dosage adherence"[tiab] OR "dosage compliance"[tiab] OR "dosage nonadherence"[tiab] OR "dosage noncompliance"[tiab] OR "dosage non adherence"[tiab] OR "dosage non compliance"[tiab] OR "dose adherence"[tiab] OR "dose compliance"[tiab] OR "dose nonadherence"[tiab] OR "dose noncompliance"[tiab] OR "dose non adherence"[tiab] OR "dose non compliance"[tiab] OR "dosing adherence"[tiab] OR "dosing compliance"[tiab] OR "dosing nonadherence"[tiab] OR "dosing noncompliance"[tiab] OR "dosing non adherence"[tiab] OR "dosing non compliance"[tiab] OR "drug adherence"[tiab] OR "drug compliance"[tiab] OR "drug nonadherence"[tiab] OR "drug noncompliance"[tiab] OR "drug non adherence"[tiab] OR "drug non compliance"[tiab] OR "drug intake compliance"[tiab] OR "drug intake adherence"[tiab] OR "drug intake noncompliance"[tiab] OR "drug intake nonadherence"[tiab] OR "drug intake non compliance"[tiab] OR "drug intake non adherence"[tiab] OR "drug regimen adherence"[tiab] OR "drug regimen compliance"[tiab] OR "drug regimen nonadherence"[tiab] OR "drug regimen noncompliance"[tiab] OR "drug regimen non adherence"[tiab] OR "drug regimen non compliance"[tiab] OR "education of patient"[tiab] OR "education of patients"[tiab] OR "enter to care"[tiab] OR "entry to care"[tiab] OR "gatekeeping"[tiab] OR "health care delivery"[tiab] OR "health care supply"[tiab] OR "health

services accessibility"[tiab] OR "healthcare delivery"[tiab] OR "healthcare delivery"[tiab] OR "healthcare supply"[tiab] OR "initiate care"[tiab] OR "link"[tiab] OR "linkage to care"[tiab] OR "linkage"[tiab] OR "linked to care"[tiab] OR "linked to hiv care"[tiab] OR "links"[tiab] OR "lrc"[tiab] OR "medication adherence"[tiab] OR "medication compliance"[tiab] OR "medication nonadherence"[tiab] OR "medication noncompliance"[tiab] OR "medication non adherence"[tiab] OR "medication non compliance"[tiab] OR "medication intake adherence"[tiab] OR "medication intake non adherence"[tiab] OR "medication intake non compliance"[tiab] OR "medication intake nonadherence"[tiab] OR "medication intake noncompliance"[tiab] OR "patient adherence"[tiab] OR "patient compliance"[tiab] OR "patient cooperation"[tiab] OR "patient ed"[tiab] OR "patient education"[tiab] OR "patient medication knowledge"[tiab] OR "patient non adherence"[tiab] OR "patient non adherence"[tiab] OR "patient non compliance"[tiab] OR "patient nonadherence"[tiab] OR "patient noncompliance"[tiab] OR "patients adherence"[tiab] OR "patient s adherence"[tiab] OR "patients nonadherence"[tiab] OR "patient s nonadherence"[tiab] OR "patients non adherence"[tiab] OR "patient s non adherence"[tiab] OR "provider sponsored organisations"[tiab] OR "provider sponsored organizations"[tiab] OR "provider sponsored organisation"[tiab] OR "provider sponsored organization"[tiab] OR "refer"[tiab] OR "referral"[tiab] OR "referrals"[tiab] OR "referred"[tiab] OR "relink"[tiab] OR "re link"[tiab] OR "screening"[tiab] OR "service delivery"[tiab] OR "therapeutic compliance"[tiab] OR "therapeutic compliances"[tiab] OR "therapeutic non compliance"[tiab] OR "therapeutic noncompliance"[tiab] OR "therapy adherence"[tiab] OR "therapy compliance"[tiab] OR "therapy nonadherence"[tiab] OR "therapy non adherence"[tiab] OR "therapy noncompliance"[tiab] OR "therapy non compliance"[tiab] OR "treatment adherence"[tiab] OR "treatment compliance"[tiab] OR "treatment compliances"[tiab] OR "treatment non adherence"[tiab] OR "treatment non compliance"[tiab] OR "treatment nonadherence"[tiab] OR "treatment noncompliance"[tiab]) AND ("randomized controlled trial"[pt] OR "controlled clinical trial"[pt] OR "clinical trial"[pt] OR "double-blind method"[mesh] OR "equivalence trial"[pt] OR "clinical studies"[tw] OR "clinical study"[tw] OR "clinical trial"[tw] OR "clinical trials"[tw] OR "controlled studies"[tw] OR "controlled study"[tw] OR "controlled trial"[tw] OR "controlled trials"[tw] OR "double blind"[tw] OR "double blinded"[tw] OR "double mask"[tw] OR "double masked"[tw] OR "equivalence trial"[tw] OR "equivalence trials"[tw] OR "implementation"[tw] OR "intervention"[tw] OR "interventions"[tw] OR "methodological study"[tw] OR "methodological studies"[tw] OR "methods studies"[tw] OR "methods study"[tw] OR "methods"[sh] OR "multicenter study"[tw] OR "non inferiority trial"[tw] OR "non inferiority trials"[tw] OR "noninferiority trial"[tw] OR "noninferiority trials"[tw] OR "randomised"[tw] OR "randomized"[tw] OR "randomly"[tw] OR "RCT"[tw] OR "RCTs"[tw] OR "superiority trial"[tw] OR "superiority trials"[tw]) AND ("Africa"[mesh:noexp] OR "africa south of the sahara"[mesh] OR "africa, central"[mesh] OR "africa, eastern"[mesh] OR "africa, southern"[mesh] OR "africa, western"[mesh] OR "angola"[mesh] OR "benin"[mesh] OR "botswana"[mesh] OR "burkina faso"[mesh] OR "burundi"[mesh] OR "cabo verde"[mesh] OR "cameroon"[mesh] OR "central african republic"[mesh] OR "chad"[mesh] OR "congo"[mesh] OR "cote d'ivoire"[mesh] OR "democratic republic of the congo"[mesh] OR "djibouti"[mesh] OR "equatorial guinea"[mesh] OR "eritrea"[mesh] OR "ethiopia"[mesh] OR "gabon"[mesh] OR "gambia"[mesh] OR "ghana"[mesh] OR "guinea"[mesh] OR "guinea-bissau"[mesh] OR "kenya"[mesh] OR "lesotho"[mesh] OR "liberia"[mesh] OR "malawi"[mesh] OR "mali"[mesh] OR "mauritania"[mesh] OR "mozambique"[mesh] OR "namibia"[mesh] OR "angola"[tw] OR

"benin"[tw] OR "botswana"[tw] OR "burkina faso"[tw] OR "burundi"[tw] OR "cabo verde"[tw] OR "cameroon"[tw] OR "central african republic"[tw] OR "chad"[tw] OR "congo"[tw] OR "cote d'ivoire"[tw] OR "democratic republic of the congo"[tw] OR "djibouti"[tw] OR "equatorial guinea"[tw] OR "eritrea"[tw] OR "ethiopia"[tw] OR "gabon"[tw] OR "gambia"[tw] OR "ghana"[tw] OR "guinea"[tw] OR "guinea-bissau"[tw] OR "kenya"[tw] OR "lesotho"[tw] OR "liberia"[tw] OR "malawi"[tw] OR "mali"[tw] OR "mauritania"[tw] OR "mozambique"[tw] OR "namibia"[tw] OR "niger"[tw] OR "nigeria"[tw] OR "rwanda"[tw] OR "sao tome and principe"[tw] OR "senegal"[tw] OR "sierra leone"[tw] OR "somalia"[tw] OR "south africa"[tw] OR "south sudan"[tw] OR "sudan"[tw] OR "swaziland"[tw] OR "tanzania"[tw] OR "togo"[tw] OR "uganda"[tw] OR "zambia"[tw] OR "zimbabwe"[tw] OR "subsaharan"[tw] OR "sub saharan"[tw] OR "sub sahara"[tw] OR "subsahara"[tw] OR "south of the sahara"[tw])

## Embase

('Human immunodeficiency virus'/de OR 'Human immunodeficiency virus 1'/exp OR 'Human immunodeficiency virus 2'/exp OR 'Human immunodeficiency virus infection'/de OR 'aids associated lentivirus':ti,ab OR 'aids associated retrovirus':ti,ab OR 'aids associated virus':ti,ab OR 'aids related virus':ti,ab OR 'AIDS virus':ti,ab OR 'hiv':ti,ab OR 'hiv-1':ti,ab OR 'hiv-2':ti,ab OR 'htlv-iii':ti,ab OR 'human immune deficiency virus':ti,ab OR 'human immune deficiency viruses':ti,ab OR 'human immuno deficiency virus':ti,ab OR 'human immuno deficiency viruses':ti,ab OR 'human immunodeficiency virus 1':ti,ab OR 'human immunodeficiency virus 2':ti,ab OR 'human immunodeficiency virus':ti,ab OR 'human immunodeficiency viruses':ti,ab OR 'human t cell leukemia virus type iii':ti,ab OR 'human t cell leukaemia virus type iii':ti,ab OR 'human t cell lymphotropic virus type iii':ti,ab OR 'human t lymphotropic virus type iii':ti,ab OR 'human t-cell leukemia virus type iii':ti,ab OR 'human t-cell lymphotropic virus type iii':ti,ab OR 'human t-lymphotropic virus type iii':ti,ab OR 'immunodeficiency associated virus':ti,ab OR 'lymphadenopathy associated retrovirus':ti,ab OR 'lymphadenopathy associated virus':ti,ab) AND ('health care delivery'/de OR 'medication compliance'/exp OR 'patient compliance'/de OR 'patient education':ti,ab,kw OR 'patient medication knowledge':ti,ab,kw OR 'patient referral'/exp OR 'treatment adherence and compliance':ti,ab,kw OR 'adherence to therapy':ti,ab OR 'adherence to treatment':ti,ab OR 'compliance to therapy':ti,ab OR 'compliance to treatment':ti,ab OR 'delivery of care':ti,ab OR 'delivery of health care':ti,ab OR 'delivery of healthcare':ti,ab OR 'dosage adherence':ti,ab OR 'dosage compliance':ti,ab OR 'dosage nonadherence':ti,ab OR 'dosage noncompliance':ti,ab OR 'dosage non adherence':ti,ab OR 'dosage non compliance':ti,ab OR 'dose adherence':ti,ab OR 'dose compliance':ti,ab OR 'dose nonadherence':ti,ab OR 'dose noncompliance':ti,ab OR 'dose non adherence':ti,ab OR 'dose non compliance':ti,ab OR 'dosing adherence':ti,ab OR 'dosing compliance':ti,ab OR 'dosing nonadherence':ti,ab OR 'dosing noncompliance':ti,ab OR 'dosing non adherence':ti,ab OR 'dosing non compliance':ti,ab OR 'drug adherence':ti,ab OR 'drug compliance':ti,ab OR 'drug nonadherence':ti,ab OR 'drug noncompliance':ti,ab OR 'drug non adherence':ti,ab OR 'drug non compliance':ti,ab OR 'drug intake compliance':ti,ab OR 'drug intake adherence':ti,ab OR 'drug intake noncompliance':ti,ab OR 'drug intake nonadherence':ti,ab OR 'drug intake non compliance':ti,ab OR 'drug intake non adherence':ti,ab OR 'drug regimen adherence':ti,ab OR 'drug regimen compliance':ti,ab OR 'drug regimen nonadherence':ti,ab OR 'drug regimen noncompliance':ti,ab OR 'drug regimen non adherence':ti,ab OR 'drug regimen non compliance':ti,ab OR 'education of patient':ti,ab OR 'education of patients':ti,ab OR 'enter to care':ti,ab OR 'entry to care':ti,ab OR 'gatekeeping':ti,ab OR 'health care delivery':ti,ab OR 'health care supply':ti,ab OR 'health services accessibility':ti,ab

OR 'healthcare delivery':ti,ab OR 'healthcare delivery':ti,ab OR 'healthcare supply':ti,ab OR 'initiate care':ti,ab OR 'link':ti,ab OR 'linkage to care':ti,ab OR 'linkage':ti,ab OR 'linked to care':ti,ab OR 'linked to hiv care':ti,ab OR 'links':ti,ab OR 'lrc':ti,ab OR 'medication adherence':ti,ab OR 'medication compliance':ti,ab OR 'medication nonadherence':ti,ab OR 'medication noncompliance':ti,ab OR 'medication non adherence':ti,ab OR 'medication non compliance':ti,ab OR 'medication intake adherence':ti,ab OR 'medication intake non adherence':ti,ab OR 'medication intake non compliance':ti,ab OR 'medication intake nonadherence':ti,ab OR 'medication intake noncompliance':ti,ab OR 'patient adherence':ti,ab OR 'patient compliance':ti,ab OR 'patient cooperation':ti,ab OR 'patient ed':ti,ab OR 'patient education':ti,ab OR 'patient medication knowledge':ti,ab OR 'patient non adherence':ti,ab OR 'patient non adherence':ti,ab OR 'patient non compliance':ti,ab OR 'patient nonadherence':ti,ab OR 'patient noncompliance':ti,ab OR 'patients adherence':ti,ab OR 'patient s adherence':ti,ab OR 'patients nonadherence':ti,ab OR 'patient s nonadherence':ti,ab OR 'patients non adherence':ti,ab OR 'patient s non adherence':ti,ab OR 'provider sponsored organisations':ti,ab OR 'provider sponsored organizations':ti,ab OR 'provider sponsored organisation':ti,ab OR 'provider sponsored organization':ti,ab OR 'refer':ti,ab OR 'referral':ti,ab OR 'referrals':ti,ab OR 'referred':ti,ab OR 'relink':ti,ab OR 're link':ti,ab OR 'screening':ti,ab OR 'service delivery':ti,ab OR 'therapeutic compliance':ti,ab OR 'therapeutic compliances':ti,ab OR 'therapeutic non compliance':ti,ab OR 'therapeutic noncompliance':ti,ab OR 'therapy adherence':ti,ab OR 'therapy compliance':ti,ab OR 'therapy nonadherence':ti,ab OR 'therapy non adherence':ti,ab OR 'therapy noncompliance':ti,ab OR 'therapy non compliance':ti,ab OR 'treatment adherence':ti,ab OR 'treatment compliance':ti,ab OR 'treatment compliances':ti,ab OR 'treatment non adherence':ti,ab OR 'treatment non compliance':ti,ab OR 'treatment nonadherence':ti,ab OR 'treatment noncompliance':ti,ab) AND ('randomized controlled trial'/de OR 'controlled clinical trial'/de OR 'clinical trial'/de OR 'double blind procedure'/exp OR 'equivalence trial'/de OR 'clinical studies':ti,ab,de,kw OR 'clinical study':ti,ab,de,kw OR 'clinical trial':ti,ab,de,kw OR 'clinical trials':ti,ab,de,kw OR 'controlled studies':ti,ab,de,kw OR 'controlled study':ti,ab,de,kw OR 'controlled trial':ti,ab,de,kw OR 'controlled trials':ti,ab,de,kw OR 'double blind':ti,ab,de,kw OR 'double blinded':ti,ab,de,kw OR 'double mask':ti,ab,de,kw OR 'double masked':ti,ab,de,kw OR 'equivalence trial':ti,ab,de,kw OR 'equivalence trials':ti,ab,de,kw OR 'implementation':ti,ab,de,kw OR 'intervention':ti,ab,de,kw OR 'interventions':ti,ab,de,kw OR 'methodological study':ti,ab,de,kw OR 'methodological studies':ti,ab,de,kw OR 'methods studies':ti,ab,de,kw OR 'methods study':ti,ab,de,kw OR 'methods':ti,ab,de,kw OR 'multicenter study':ti,ab,de,kw OR 'non inferiority trial':ti,ab,de,kw OR 'non inferiority trials':ti,ab,de,kw OR 'noninferiority trial':ti,ab,de,kw OR 'noninferiority trials':ti,ab,de,kw OR 'randomised':ti,ab,de,kw OR 'randomized':ti,ab,de,kw OR 'randomly':ti,ab,de,kw OR 'RCT':ti,ab,de,kw OR 'RCTs':ti,ab,de,kw OR 'superiority trial':ti,ab,de,kw OR 'superiority trials':ti,ab,de,kw) AND ('Africa'/de OR 'africa south of the sahara'/exp OR 'angola'/exp OR 'benin'/exp OR 'botswana'/exp OR 'burkina faso'/exp OR 'burundi'/exp OR 'cabo verde'/exp OR 'cameroon'/exp OR 'central african republic'/exp OR 'chad'/exp OR 'congo'/exp OR 'Cote d'Ivoire'/exp OR 'democratic republic of the congo'/exp OR 'djibouti'/exp OR 'equatorial guinea'/exp OR 'eritrea'/exp OR 'ethiopia'/exp OR 'gabon'/exp OR 'gambia'/exp OR 'ghana'/exp OR 'guinea'/exp OR 'guinea-bissau'/exp OR 'kenya'/exp OR 'lesotho'/exp OR 'liberia'/exp OR 'malawi'/exp OR 'mali'/exp OR 'mauritania'/exp OR 'mozambique'/exp OR 'namibia'/exp OR 'angola':ti,ab,kw OR 'benin':ti,ab,kw OR 'botswana':ti,ab,kw OR 'burkina faso':ti,ab,kw OR 'burundi':ti,ab,kw OR 'cabo verde':ti,ab,kw OR 'cameroon':ti,ab,kw OR 'central african republic':ti,ab,kw OR 'chad':ti,ab,kw OR 'congo':ti,ab,kw

OR 'Cote d'Ivoire':ti,ab,kw OR 'democratic republic of the congo':ti,ab,kw OR 'djibouti':ti,ab,kw OR 'equatorial guinea':ti,ab,kw OR 'eritrea':ti,ab,kw OR 'ethiopia':ti,ab,kw OR 'gabon':ti,ab,kw OR 'gambia':ti,ab,kw OR 'ghana':ti,ab,kw OR 'guinea':ti,ab,kw OR 'guinea-bissau':ti,ab,kw OR 'kenya':ti,ab,kw OR 'lesotho':ti,ab,kw OR 'liberia':ti,ab,kw OR 'malawi':ti,ab,kw OR 'mali':ti,ab,kw OR 'mauritania':ti,ab,kw OR 'mozambique':ti,ab,kw OR 'namibia':ti,ab,kw OR 'niger':ti,ab,kw OR 'nigeria':ti,ab,kw OR 'rwanda':ti,ab,kw OR 'sao tome and principe':ti,ab,kw OR 'senegal':ti,ab,kw OR 'sierra leone':ti,ab,kw OR 'somalia':ti,ab,kw OR 'south africa':ti,ab,kw OR 'south sudan':ti,ab,kw OR 'sudan':ti,ab,kw OR 'swaziland':ti,ab,kw OR 'tanzania':ti,ab,kw OR 'togo':ti,ab,kw OR 'uganda':ti,ab,kw OR 'zambia':ti,ab,kw OR 'zimbabwe':ti,ab,kw OR 'sub Saharan':ti,ab,kw OR 'sub saharan':ti,ab,kw OR 'sub sahara':ti,ab,kw OR 'south of the sahara':ti,ab,kw)

## Web of Science

TS=("hiv" OR "hiv-1" OR "hiv-2" OR "hiv infections" OR "aids associated lentivirus" OR "aids associated retrovirus" OR "aids associated virus" OR "aids related virus" OR "AIDS virus" OR "hiv" OR "hiv-1" OR "hiv-2" OR "htlv-iii" OR "human immune deficiency virus" OR "human immune deficiency viruses" OR "human immuno deficiency virus" OR "human immuno deficiency viruses" OR "human immunodeficiency virus 1" OR "human immunodeficiency virus 2" OR "human immunodeficiency virus" OR "human immunodeficiency viruses" OR "human t cell leukemia virus type iii" OR "human t cell leukaemia virus type iii" OR "human t cell lymphotropic virus type iii" OR "human t lymphotropic virus type iii" OR "human t-cell leukemia virus type iii" OR "human t-cell lymphotropic virus type iii" OR "human t-lymphotropic virus type iii" OR "immunodeficiency associated virus" OR "lymphadenopathy associated retrovirus" OR "lymphadenopathy associated virus") AND TS=("delivery of health care" OR "medication adherence" OR "patient compliance" OR "patient education as topic" OR "patient medication knowledge" OR "referral and consultation" OR "treatment adherence and compliance" OR "adherence to therapy" OR "adherence to treatment" OR "compliance to therapy" OR "compliance to treatment" OR "delivery of care" OR "delivery of health care" OR "delivery of healthcare" OR "dosage adherence" OR "dosage compliance" OR "dosage nonadherence" OR "dosage noncompliance" OR "dosage non adherence" OR "dosage non compliance" OR "dose adherence" OR "dose compliance" OR "dose nonadherence" OR "dose noncompliance" OR "dose non adherence" OR "dose non compliance" OR "dosing adherence" OR "dosing compliance" OR "dosing nonadherence" OR "dosing noncompliance" OR "dosing non adherence" OR "dosing non compliance" OR "drug adherence" OR "drug compliance" OR "drug nonadherence" OR "drug noncompliance" OR "drug non adherence" OR "drug non compliance" OR "drug intake compliance" OR "drug intake adherence" OR "drug intake noncompliance" OR "drug intake nonadherence" OR "drug intake non compliance" OR "drug intake non adherence" OR "drug regimen adherence" OR "drug regimen compliance" OR "drug regimen nonadherence" OR "drug regimen noncompliance" OR "drug regimen non adherence" OR "drug regimen non compliance" OR "education of patient" OR "education of patients" OR "enter to care" OR "entry to care" OR "gatekeeping" OR "health care delivery" OR "health care supply" OR "health services accessibility" OR "healthcare delivery" OR "healthcare delivery" OR "healthcare supply" OR "initiate care" OR "link" OR "linkage to care" OR "linkage" OR

"linked to care" OR "linked to hiv care" OR "links" OR "lvc" OR "medication adherence" OR "medication compliance" OR "medication nonadherence" OR "medication noncompliance" OR "medication non adherence" OR "medication non compliance" OR "medication intake adherence" OR "medication intake non adherence" OR "medication intake non compliance" OR "medication intake nonadherence" OR "medication intake noncompliance" OR "patient adherence" OR "patient compliance" OR "patient cooperation" OR "patient ed" OR "patient education" OR "patient medication knowledge" OR "patient non adherence" OR "patient non adherence" OR "patient non compliance" OR "patient nonadherence" OR "patient noncompliance" OR "patients adherence" OR "patient s adherence" OR "patients nonadherence" OR "patient s nonadherence" OR "patients non adherence" OR "patient s non adherence" OR "provider sponsored organisations" OR "provider sponsored organizations" OR "provider sponsored organisation" OR "provider sponsored organization" OR "refer" OR "referral" OR "referrals" OR "referred" OR "relink" OR "re link" OR "screening" OR "service delivery" OR "therapeutic compliance" OR "therapeutic compliances" OR "therapeutic non compliance" OR "therapeutic noncompliance" OR "therapy adherence" OR "therapy compliance" OR "therapy nonadherence" OR "therapy non adherence" OR "therapy noncompliance" OR "therapy non compliance" OR "treatment adherence" OR "treatment compliance" OR "treatment compliances" OR "treatment non adherence" OR "treatment non compliance" OR "treatment nonadherence" OR "treatment noncompliance") AND TS=("randomized controlled trial" OR "controlled clinical trial" OR "clinical trial" OR "double-blind method" OR "equivalence trial" OR "clinical studies" OR "clinical study" OR "clinical trial" OR "clinical trials" OR "controlled studies" OR "controlled study" OR "controlled trial" OR "controlled trials" OR "double blind" OR "double blinded" OR "double mask" OR "double masked" OR "equivalence trial" OR "equivalence trials" OR "implementation" OR "intervention" OR "interventions" OR "methodological study" OR "methodological studies" OR "methods studies" OR "methods study" OR "methods" OR "multicenter study" OR "non inferiority trial" OR "non inferiority trials" OR "noninferiority trial" OR "noninferiority trials" OR "randomised" OR "randomized" OR "randomly" OR "RCT" OR "RCTs" OR "superiority trial" OR "superiority trials") AND TS=("Africa" OR "africa south of the sahara" OR "africa, central" OR "africa, eastern" OR "africa, southern" OR "africa, western" OR "angola" OR "benin" OR "botswana" OR "burkina faso" OR "burundi" OR "cabo verde" OR "cameroon" OR "central african republic" OR "chad" OR "congo" OR "cote d'ivoire" OR "democratic republic of the congo" OR "djibouti" OR "equatorial guinea" OR "eritrea" OR "ethiopia" OR "gabon" OR "gambia" OR "ghana" OR "guinea" OR "guinea-bissau" OR "kenya" OR "lesotho" OR "liberia" OR "malawi" OR "mali" OR "mauritania" OR "mozambique" OR "namibia" OR "angola" OR "benin" OR "botswana" OR "burkina faso" OR "burundi" OR "cabo verde" OR "cameroon" OR "central african republic" OR "chad" OR "congo" OR "cote d'ivoire" OR "democratic republic of the congo" OR "djibouti" OR "equatorial guinea" OR "eritrea" OR "ethiopia" OR "gabon" OR "gambia" OR "ghana" OR "guinea" OR "guinea-bissau" OR "kenya" OR "lesotho" OR "liberia" OR "malawi" OR "mali" OR "mauritania" OR "mozambique" OR "namibia" OR "niger" OR "nigeria" OR "rwanda" OR "sao tome and principe" OR "senegal" OR "sierra leone" OR "somalia" OR "south africa" OR "south sudan" OR "sudan" OR "swaziland" OR "tanzania" OR "togo" OR "uganda" OR "zambia" OR "zimbabwe" OR "subsaharan" OR "sub saharan" OR "sub sahara" OR "subsahara" OR "south of the sahara")

## Scopus

TITLE-ABS-KEY({hiv} OR {hiv-1} OR {hiv-2} OR {hiv infections} OR {aids associated lentivirus} OR {aids associated retrovirus} OR {aids associated virus} OR {aids related virus} OR {AIDS virus} OR {hiv} OR {hiv-1} OR {hiv-2} OR {htlv-iii} OR {human immune deficiency virus} OR {human immune deficiency viruses} OR {human immuno deficiency virus} OR {human immuno deficiency viruses} OR {human immunodeficiency virus 1} OR {human immunodeficiency virus 2} OR {human immunodeficiency virus} OR {human immunodeficiency viruses} OR {human t cell leukemia virus type iii} OR {human t cell leukaemia virus type iii} OR {human t cell lymphotropic virus type iii} OR {human t lymphotropic virus type iii} OR {human t-cell leukemia virus type iii} OR {human t-cell lymphotropic virus type iii} OR {human t-lymphotropic virus type iii} OR {immunodeficiency associated virus} OR {lymphadenopathy associated retrovirus} OR {lymphadenopathy associated virus}) AND TITLE-ABS-KEY({delivery of health care} OR {medication adherence} OR {patient compliance} OR {patient education as topic} OR {patient medication knowledge} OR {referral and consultation} OR {treatment adherence and compliance} OR {adherence to therapy} OR {adherence to treatment} OR {compliance to therapy} OR {compliance to treatment} OR {delivery of care} OR {delivery of health care} OR {delivery of healthcare} OR {dosage adherence} OR {dosage compliance} OR {dosage nonadherence} OR {dosage noncompliance} OR {dosage non adherence} OR {dosage non compliance} OR {dose adherence} OR {dose compliance} OR {dose nonadherence} OR {dose noncompliance} OR {dose non adherence} OR {dose non compliance} OR {dosing adherence} OR {dosing compliance} OR {dosing nonadherence} OR {dosing noncompliance} OR {dosing non adherence} OR {dosing non compliance} OR {drug adherence} OR {drug compliance} OR {drug nonadherence} OR {drug noncompliance} OR {drug non adherence} OR {drug non compliance} OR {drug intake compliance} OR {drug intake adherence} OR {drug intake noncompliance} OR {drug intake nonadherence} OR {drug intake non compliance} OR {drug intake non adherence} OR {drug regimen adherence} OR {drug regimen compliance} OR {drug regimen nonadherence} OR {drug regimen noncompliance} OR {drug regimen non adherence} OR {drug regimen non compliance} OR {education of patient} OR {education of patients} OR {enter to care} OR {entry to care} OR {gatekeeping} OR {health care delivery} OR {health care supply} OR {health services accessibility} OR {healthcare delivery} OR {healthcare delivery} OR {healthcare supply} OR {initiate care} OR {link} OR {linkage to care} OR {linkage} OR {linked to care} OR {linked to hiv care} OR {links} OR {lrc} OR {medication adherence} OR {medication compliance} OR {medication nonadherence} OR {medication noncompliance} OR {medication non adherence} OR {medication non compliance} OR {medication intake adherence} OR {medication intake non adherence} OR {medication intake non compliance} OR {medication intake nonadherence} OR {medication intake noncompliance} OR {patient adherence} OR {patient compliance} OR {patient cooperation} OR {patient ed} OR {patient education} OR {patient medication knowledge} OR {patient non adherence} OR {patient non adherence} OR {patient non compliance} OR {patient nonadherence} OR {patient noncompliance} OR {patients adherence} OR {patient s adherence} OR {patients nonadherence} OR {patient s nonadherence} OR {patients non adherence} OR {patient s non adherence} OR {provider sponsored organisations} OR {provider sponsored organizations} OR {provider sponsored organisation} OR {provider sponsored organization} OR {refer} OR {referral} OR {referrals} OR {referred} OR {relink} OR {re link} OR {screening} OR {service delivery} OR {therapeutic compliance} OR {therapeutic compliances} OR {therapeutic non

compliance} OR {therapeutic noncompliance} OR {therapy adherence} OR {therapy compliance} OR {therapy nonadherence} OR {therapy non adherence} OR {therapy noncompliance} OR {therapy non compliance} OR {treatment adherence} OR {treatment compliance} OR {treatment compliances} OR {treatment non adherence} OR {treatment non compliance} OR {treatment nonadherence} OR {treatment noncompliance})) AND TITLE-ABS-KEY({randomized controlled trial} OR {controlled clinical trial} OR {clinical trial} OR {double-blind method} OR {equivalence trial} OR {clinical studies} OR {clinical study} OR {clinical trial} OR {clinical trials} OR {controlled studies} OR {controlled study} OR {controlled trial} OR {controlled trials} OR {double blind} OR {double blinded} OR {double mask} OR {double masked} OR {equivalence trial} OR {equivalence trials} OR {implementation} OR {intervention} OR {interventions} OR {methodological study} OR {methodological studies} OR {methods studies} OR {methods study} OR {methods} OR {multicenter study} OR {non inferiority trial} OR {non inferiority trials} OR {noninferiority trial} OR {noninferiority trials} OR {randomised} OR {randomized} OR {randomly} OR {RCT} OR {RCTs} OR {superiority trial} OR {superiority trials})) AND TITLE-ABS-KEY({Africa} OR {africa south of the sahara} OR {africa, central} OR {africa, eastern} OR {africa, southern} OR {africa, western} OR {angola} OR {benin} OR {botswana} OR {burkina faso} OR {burundi} OR {cabo verde} OR {cameroon} OR {central african republic} OR {chad} OR {congo} OR {cote d'ivoire} OR {democratic republic of the congo} OR {djibouti} OR {equatorial guinea} OR {eritrea} OR {ethiopia} OR {gabon} OR {gambia} OR {ghana} OR {guinea} OR {guinea-bissau} OR {kenya} OR {lesotho} OR {liberia} OR {malawi} OR {mali} OR {mauritania} OR {mozambique} OR {namibia} OR {angola} OR {benin} OR {botswana} OR {burkina faso} OR {burundi} OR {cabo verde} OR {cameroon} OR {central african republic} OR {chad} OR {congo} OR {cote d'ivoire} OR {democratic republic of the congo} OR {djibouti} OR {equatorial guinea} OR {eritrea} OR {ethiopia} OR {gabon} OR {gambia} OR {ghana} OR {guinea} OR {guinea-bissau} OR {kenya} OR {lesotho} OR {liberia} OR {malawi} OR {mali} OR {mauritania} OR {mozambique} OR {namibia} OR {niger} OR {nigeria} OR {rwanda} OR {sao tome and principe} OR {senegal} OR {sierra leone} OR {somalia} OR {south africa} OR {south sudan} OR {sudan} OR {swaziland} OR {tanzania} OR {togo} OR {uganda} OR {zambia} OR {zimbabwe} OR {subsaharan} OR {sub saharan} OR {sub sahara} OR {subsahara} OR {south of the sahara}))

## **Global Health**

("hiv" OR "hiv-1" OR "hiv-2" OR "hiv infections" OR "aids associated lentivirus" OR "aids associated retrovirus" OR "aids associated virus" OR "aids related virus" OR "AIDS virus" OR "hiv" OR "hiv-1" OR "hiv-2" OR "htlv-iii" OR "human immune deficiency virus" OR "human immune deficiency viruses" OR "human immuno deficiency virus" OR "human immuno deficiency viruses" OR "human immunodeficiency virus 1" OR "human immunodeficiency virus 2" OR "human immunodeficiency virus" OR "human immunodeficiency viruses" OR "human t cell leukemia virus type iii" OR "human t cell leukaemia virus type iii" OR "human t cell lymphotropic virus type iii" OR "human t lymphotropic virus type iii" OR "human t-cell leukemia virus type iii" OR "human t-cell lymphotropic virus type iii" OR "human t-lymphotropic virus type iii" OR "immunodeficiency associated virus" OR "lymphadenopathy associated retrovirus" OR "lymphadenopathy associated virus").mp. AND ("delivery of health care" OR "medication adherence" OR "patient compliance" OR "patient education as topic" OR



"patient medication knowledge" OR "referral and consultation" OR "treatment adherence and compliance" OR "adherence to therapy" OR "adherence to treatment" OR "compliance to therapy" OR "compliance to treatment" OR "delivery of care" OR "delivery of health care" OR "delivery of healthcare" OR "dosage adherence" OR "dosage compliance" OR "dosage nonadherence" OR "dosage noncompliance" OR "dosage non adherence" OR "dosage non compliance" OR "dose adherence" OR "dose compliance" OR "dose nonadherence" OR "dose noncompliance" OR "dose non adherence" OR "dose non compliance" OR "dosing adherence" OR "dosing compliance" OR "dosing nonadherence" OR "dosing noncompliance" OR "dosing non adherence" OR "dosing non compliance" OR "drug adherence" OR "drug compliance" OR "drug nonadherence" OR "drug noncompliance" OR "drug non adherence" OR "drug non compliance" OR "drug intake compliance" OR "drug intake adherence" OR "drug intake noncompliance" OR "drug intake nonadherence" OR "drug intake non compliance" OR "drug intake non adherence" OR "drug regimen adherence" OR "drug regimen compliance" OR "drug regimen nonadherence" OR "drug regimen noncompliance" OR "drug regimen non adherence" OR "drug regimen non compliance" OR "education of patient" OR "education of patients" OR "enter to care" OR "entry to care" OR "gatekeeping" OR "health care delivery" OR "health care supply" OR "health services accessibility" OR "healthcare delivery" OR "healthcare delivery" OR "healthcare supply" OR "initiate care" OR "link" OR "linkage to care" OR "linkage" OR "linked to care" OR "linked to hiv care" OR "links" OR "lrc" OR "medication adherence" OR "medication compliance" OR "medication nonadherence" OR "medication noncompliance" OR "medication non adherence" OR "medication non compliance" OR "medication intake adherence" OR "medication intake non adherence" OR "medication intake non compliance" OR "medication intake nonadherence" OR "medication intake noncompliance" OR "patient adherence" OR "patient compliance" OR "patient cooperation" OR "patient ed" OR "patient education" OR "patient medication knowledge" OR "patient non adherence" OR "patient non adherence" OR "patient non compliance" OR "patient nonadherence" OR "patient noncompliance" OR "patients adherence" OR "patient s adherence" OR "patients nonadherence" OR "patient s nonadherence" OR "patients non adherence" OR "patient s non adherence" OR "provider sponsored organisations" OR "provider sponsored organizations" OR "provider sponsored organisation" OR "provider sponsored organization" OR "refer" OR "referral" OR "referrals" OR "referred" OR "relink" OR "re link" OR "screening" OR "service delivery" OR "therapeutic compliance" OR "therapeutic compliances" OR "therapeutic non compliance" OR "therapeutic noncompliance" OR "therapy adherence" OR "therapy compliance" OR "therapy nonadherence" OR "therapy non adherence" OR "therapy noncompliance" OR "therapy non compliance" OR "treatment adherence" OR "treatment compliance" OR "treatment compliances" OR "treatment non adherence" OR "treatment non compliance" OR "treatment nonadherence" OR "treatment noncompliance").mp. AND ("randomized controlled trial" OR "controlled clinical trial" OR "clinical trial" OR "double-blind method" OR "equivalence trial" OR "clinical studies" OR "clinical study" OR "clinical trial" OR "clinical trials" OR "controlled studies" OR "controlled study" OR "controlled trial" OR "controlled trials" OR "double blind" OR "double blinded" OR "double mask" OR "double masked" OR "equivalence trial" OR "equivalence trials" OR "implementation" OR "intervention" OR "interventions" OR "methodological study" OR "methodological studies" OR "methods studies" OR "methods study" OR "methods" OR "multicenter study" OR "non inferiority trial" OR "non inferiority trials" OR "noninferiority trial" OR "noninferiority trials" OR "randomised" OR "randomized" OR "randomly" OR "RCT" OR "RCTs" OR "superiority

trial" OR "superiority trials").mp. AND ("Africa" OR "africa south of the sahara" OR "africa, central" OR "africa, eastern" OR "africa, southern" OR "africa, western" OR "angola" OR "benin" OR "botswana" OR "burkina faso" OR "burundi" OR "cabo verde" OR "cameroon" OR "central african republic" OR "chad" OR "congo" OR "cote d'ivoire" OR "democratic republic of the congo" OR "djibouti" OR "equatorial guinea" OR "eritrea" OR "ethiopia" OR "gabon" OR "gambia" OR "ghana" OR "guinea" OR "guinea-bissau" OR "kenya" OR "lesotho" OR "liberia" OR "malawi" OR "mali" OR "mauritania" OR "mozambique" OR "namibia" OR "angola" OR "benin" OR "botswana" OR "burkina faso" OR "burundi" OR "cabo verde" OR "cameroon" OR "central african republic" OR "chad" OR "congo" OR "cote d'ivoire" OR "democratic republic of the congo" OR "djibouti" OR "equatorial guinea" OR "eritrea" OR "ethiopia" OR "gabon" OR "gambia" OR "ghana" OR "guinea" OR "guinea-bissau" OR "kenya" OR "lesotho" OR "liberia" OR "malawi" OR "mali" OR "mauritania" OR "mozambique" OR "namibia" OR "niger" OR "nigeria" OR "rwanda" OR "sao tome and principe" OR "senegal" OR "sierra leone" OR "somalia" OR "south africa" OR "south sudan" OR "sudan" OR "swaziland" OR "tanzania" OR "togo" OR "uganda" OR "zambia" OR "zimbabwe" OR "subsaharan" OR "sub saharan" OR "sub sahara" OR "subsahara" OR "south of the sahara").mp.
