# Supplementary material
Source: PubMed Central journal article supplement (PMC9426653)
Supplement: NIHMS1825369-supplement-Electronic_Supplemental_Material_-_Table_2.pdf [file NIHMS1825369-supplement-Electronic_Supplemental_Material_-_Table_2.pdf]

Table 2: Summary of Study Quality

| Author (Year)     | Title                                                                                                                                                                                                                                         | Design Final | Design Final Comments                                                                                                                 | Magnitude | Sample Size | Applicability Final | Applicability Final Comments                                                                                | Overall  |
|-------------------|-----------------------------------------------------------------------------------------------------------------------------------------------------------------------------------------------------------------------------------------------|--------------|---------------------------------------------------------------------------------------------------------------------------------------|-----------|-------------|---------------------|-------------------------------------------------------------------------------------------------------------|----------|
| Abdurahman (2015) | Factors affecting acceptance of provider-initiated HIV testing and counseling services among outpatient clients in selected health facilities in Harar town, Eastern Ethiopia                                                                 | Moderate     | No significant inclusion/exclusion criteria; systematic random sampling technique; no control/baseline test rate of clinic clients    | Moderate  | 520         | Moderate            | Outpatient clinic clients in selected health facilities; good mix of rural and urban population             | Moderate |
| Abtew (2015)      | Acceptability of provider-initiated HIV testing as an intervention for prevention of mother to child transmission of HIV and associated factors among pregnant women attending at Public Health Facilities in Assosa town, Northwest Ethiopia | Low          | Cross-sectional; no comparison group                                                                                                  | Low       | 386         | Moderate            | ANC patients, two health facilities; minimal eligibility criteria                                           | Low      |
| Adebajo (2015)    | Evaluating the effect of HIV prevention strategies on uptake of HIV counselling and testing among male most-at-risk-populations in Nigeria; a cross-sectional analysis                                                                        | High         | Well-specified study population; clear design and rational; sequential strategy roll-out in different states to limit washover effect | High      | 31,609      | High                | inclusive definitions for MSM and male PWID; real world setting                                             | High     |
| Ahmed (2015)      | Improved identification and enrolment into care of HIV-exposed and -infected infants and children following a community health                                                                                                                | Moderate     | interventions ran subsequently, unknown number of tests offered/declined                                                              | High      | 7,658       | High                | included door-to-door recruitment and CHW utilized in outreach, counselling and testing; real-world setting | High     |

|                |                                                                                                                                                            |          |                                                                                                         |          |        |          |                                                                                                                       |          |
|----------------|------------------------------------------------------------------------------------------------------------------------------------------------------------|----------|---------------------------------------------------------------------------------------------------------|----------|--------|----------|-----------------------------------------------------------------------------------------------------------------------|----------|
|                | worker intervention in Lilongwe, Malawi.                                                                                                                   |          |                                                                                                         |          |        |          |                                                                                                                       |          |
| Ahmed (2017)   | Index case finding facilitates identification and linkage to care of children and young persons living with HIV/AIDS in Malawi                             | Moderate | Prospective intervention study, no comparison group, well-described methods                             | Moderate | 711    | Moderate | 65.7% of patients screened for eligibility, single center study; index cases                                          | Moderate |
| Ansa (2014)    | Delivering TB/HIV services in Ghana: a comparative study of service delivery models                                                                        | Low      | Retrospective for HIV testing rates; no controls or randomization                                       | Moderate | 590    | Moderate | Based on what delivery model the facilities used, included all TB patients; no significant exclusions                 | Moderate |
| Asiimwe (2014) | Accuracy of un-supervised versus provider-supervised self-administered HIV testing in Uganda: a randomized implementation trial                            | High     | Clearly described design and methods; specific inclusion criteria; RCT                                  | Low      | 246    | Moderate | individuals presenting for testing recruited; rural setting only (3 fishing community)                                | Moderate |
| Ayieko (2018)  | Mobile, population-wide, hybrid HIV testing strategy increases number of children tested in rural Kenya and Uganda                                         | High     | Census conducted; prospective cohort; robust testing algorithm; well described intervention             | High     | 87,700 | High     | Many rural communities (32) in 2 countries with wide reach of children; census conducted prior                        | High     |
| Azuogu (2018)  | Effect of multiple intervention models on uptake of HIV testing services and sexual behavior among residents of military cantonments in south-east Nigeria | Moderate | Control group recruited from different area than intervention; baseline data 2011, intervention in 2016 | Moderate | 700    | Moderate | civilians randomly sampled. About 50% of study participants soldiers; all participants living in military cantonments | Moderate |

|                      |                                                                                                                                                      |          |                                                                                                                                                 |          |                                                   |          |                                                                                                                                                               |          |
|----------------------|------------------------------------------------------------------------------------------------------------------------------------------------------|----------|-------------------------------------------------------------------------------------------------------------------------------------------------|----------|---------------------------------------------------|----------|---------------------------------------------------------------------------------------------------------------------------------------------------------------|----------|
| Baisley (2012)       | Uptake of voluntary counselling and testing among young people participating in an HIV prevention trial: comparison of opt-out and opt-in strategies | High     | Cross-sectional study describing effect of RCT; clear rationale; clear inclusion criteria                                                       | High     | 12,590                                            | Moderate | Young people who had attended 1 or more years of primary school between 1999–2002 within specific region                                                      | High     |
| Baisley (2019)       | Findings from home-based HIV testing and facilitated linkage after scale-up of test and treat in rural South Africa: young people still missing      | High     | Prospective cohort with specified inclusion criteria; triannual household-based surveys; no control                                             | High     | 51,380                                            | High     | all residents aged 15+                                                                                                                                        | High     |
| Becker (2010)        | Comparing couples' and individual voluntary counseling and testing for HIV at antenatal clinics in Tanzania: a randomized trial                      | High     | Clearly described design and methods; specific inclusion criteria; RCT                                                                          | Moderate | 1,521                                             | High     | Pregnant women up to 6 months at first ANC visit                                                                                                              | High     |
| Bhattacharjee (2018) | Micro-planning at scale with key populations in Kenya: Optimizing peer educator ratios for program outreach and HIV/STI service utilization          | Low      | Routine data gathering and reporting on quarterly basis                                                                                         | High     | FSW: 133,675 (estimated). MSM: 18,460 (estimated) | Moderate | Real-world data, however, participants are not well-described or characterized; key populations (FSW and MSM) in various settings and locales                 | Moderate |
| Bianchi (2019)       | Evaluation of a routine point-of-care intervention for early infant diagnosis of HIV: an observational study in eight African countries              | Moderate | Observational study with retrospective analysis of data prior to and after POC analysis; no control group; pre-intervention data not randomized | High     | 21,095                                            | High     | Infants and children in real-world setting; used national EID guidelines (8 countries); rural and urban environment, high throughput and low throughput sites | High     |
| Bochner (2019)       | Strengthening provider-initiated testing and counselling in Zimbabwe by deploying supplemental providers: a time series analysis                     | High     | Well described pre/post intervention study with control group; routine reporting systems                                                        | High     | 468,858                                           | Low      | Real-world data, however, participants are not well-described or characterized;                                                                               | Moderate |

|                   |                                                                                                                                                                                                                                                                   |          |                                                                                        |          |         |          |                                                                                                                                                           |          |
|-------------------|-------------------------------------------------------------------------------------------------------------------------------------------------------------------------------------------------------------------------------------------------------------------|----------|----------------------------------------------------------------------------------------|----------|---------|----------|-----------------------------------------------------------------------------------------------------------------------------------------------------------|----------|
| Brown (2011)      | HIV partner notification is effective and feasible in sub-Saharan Africa: Opportunities for HIV treatment and prevention                                                                                                                                          | High     | Clearly described design; specific inclusion criteria; RCT                             | Low      | 302     | Moderate | Effective for patients with newly diagnosed HIV with locatable sexual partners; requires willingness to share partner information                         | Moderate |
| Brunie (2016)     | Expanding HIV testing and counselling into communities: Feasibility, acceptability, and effects of an integrated family planning/HTC service delivery model by Village Health Teams in Uganda                                                                     | High     | Clearly described design and method; specific inclusion criteria; pair matched RCT     | Low      | 137     | Low      | Mostly women who use family planning services; Limited external validity with small sample size and narrow geographic focus; real-world data              | Moderate |
| Byamugisha (2010) | Dramatic and sustained increase in HIV-testing rates among antenatal attendees in Eastern Uganda after a policy change from voluntary counselling and testing to routine counselling and testing for HIV: a retrospective analysis of hospital records, 2002-2009 | Moderate | Retrospective analysis of routinely collected data in the antenatal clinic; no control | High     | 54,898  | Moderate | Real-world data, however, participants are not well-described or characterized; real-world data, antenatal care attendees & partners, single center study | Moderate |
| Byamugisha (2011) | Male partner antenatal attendance and HIV testing in eastern Uganda: a randomized facility-based intervention trial                                                                                                                                               | High     | Clearly described design and methods; specific inclusion criteria; pair matched RCT    | Moderate | 1,060   | Moderate | willing to provide letter to partner/spouse; real-world setting; ANC attendees                                                                            | Moderate |
| Cham (2019)       | Methods, outcomes, and costs of a 2.5-year comprehensive facility- and community-based HIV testing intervention in Bukoba Municipal Council, Tanzania, 2014-2017                                                                                                  | Low      | observational after implementation of several interventions                            | High     | 133,695 | Moderate | real-world data, however, participants are not well-described or characterized; both rural and urban settings                                             | Moderate |

|               |                                                                                                                                                                                                                                                          |          |                                                                                     |          |                   |          |                                                                                                                                                                          |          |
|---------------|----------------------------------------------------------------------------------------------------------------------------------------------------------------------------------------------------------------------------------------------------------|----------|-------------------------------------------------------------------------------------|----------|-------------------|----------|--------------------------------------------------------------------------------------------------------------------------------------------------------------------------|----------|
| Chamie (2018) | Comparative effectiveness of novel non-monetary incentives to promote HIV testing: a randomized trial                                                                                                                                                    | High     | Clearly described design and methods; specific inclusion criteria; pair matched RCT | Moderate | 2,532             | Moderate | stable community members; adults living in rural area for > 6 months with no intention of relocation in the next 3 months                                                | Moderate |
| Chanda (2017) | HIV self-testing among female sex workers in Zambia: A cluster randomized controlled trial                                                                                                                                                               | High     | Clearly described design and methods; specific inclusion criteria; pair matched RCT | Moderate | 965               | Moderate | peer educators (current or former FSW) recruit members of their social network via direct contact, but needed phone access for eligibility screening; real-world setting | Moderate |
| Choko (2015)  | Uptake, Accuracy, Safety, and Linkage into Care over Two Years of Promoting Annual Self-Testing for HIV in Blantyre, Malawi: A Community-Based Prospective Study.                                                                                        | High     | enumeration before, included quality assurance sample                               | High     | 16,660 (estimate) | High     | residents age 16+; representative of real-world settings                                                                                                                 | High     |
| Choko (2018)  | A pilot trial of the peer-based distribution of HIV self-test kits among fishermen in Bulisa, Uganda                                                                                                                                                     | Moderate | well-described, quality assurance; prospective study no comparison                  | Low      | 116               | Low      | no description of how seeds were recruited trial; fishermen receiving ART & other services or within community and their peers                                           | Low      |
| Choko (2019)  | HIV self-testing alone or with additional interventions, including financial incentives, and linkage to care or prevention among male partners of antenatal care clinic attendees in Malawi: An adaptive multi-arm, multi-stage cluster randomized trial | High     | Clearly described design and methods; specific inclusion criteria; pair matched RCT | Moderate | 2,091             | Moderate | Pregnant women presenting for first antenatal care visit with male partner not on ART; 25% not eligible                                                                  | Moderate |

|                        |                                                                                                                                                      |          |                                                                                         |          |       |          |                                                                                                                                                                                                                        |          |
|------------------------|------------------------------------------------------------------------------------------------------------------------------------------------------|----------|-----------------------------------------------------------------------------------------|----------|-------|----------|------------------------------------------------------------------------------------------------------------------------------------------------------------------------------------------------------------------------|----------|
| Church (2017)          | Impact of Integrated Services on HIV Testing: A Nonrandomized Trial among Kenyan Family Planning Clients                                             | Low      | nonrandomized, pairwise matching difficulty ensuring program implementation             | Moderate | 882   | Low      | clients of family planning clinics, excluded participants with loss to follow-up/missing data; excluded women tested prior to recruitment regardless of test results                                                   | Low      |
| Coleman (2017)         | Effectiveness of an SMS-based maternal mHealth intervention to improve clinical outcomes of HIV-positive pregnant women                              | Low      | retrospective; non-randomized                                                           | Moderate | 839   | Low      | HIV+ pregnant women, delivered in specified centers, first prenatal care visit, access to cell phone and delivered in one of the facilities                                                                            | Low      |
| Conkling (2010)        | Couples' voluntary counselling and testing and nevirapine use in antenatal clinics in two African capitals: a prospective cohort study               | Low      | Prospective cohort with no comparison; limited testing capacity; 1054 lost to follow-up | Moderate | 3,625 | Low      | Only two antenatal clinics in each city selected, could not accommodate all women in clinic; excluded pregnant women with pregnancy complications and who desired to deliver at a non-participating clinic or hospital | Low      |
| Courtenay-Quirk (2018) | Increasing partner HIV testing and linkage to care in TB settings: findings from an implementation study in Pwani, Tanzania                          | Moderate | Convenience selection of clinics; stepped-wedge design                                  | Moderate | 1,288 | Moderate | Geographically limited; persons with TB                                                                                                                                                                                | Moderate |
| Dalal (2011)           | Provider-initiated HIV testing and counseling: increased uptake in two public community health centers in South Africa and implications for scale-up | Moderate | Clear design and rational; Systematic selection of study participants described         | Moderate | 912   | Moderate | single province; non-pregnant adults below 50; many exclusion criteria                                                                                                                                                 | Moderate |

|                |                                                                                                                                                           |          |                                                                        |          |        |          |                                                                                                                                  |          |
|----------------|-----------------------------------------------------------------------------------------------------------------------------------------------------------|----------|------------------------------------------------------------------------|----------|--------|----------|----------------------------------------------------------------------------------------------------------------------------------|----------|
| Dalal (2013)   | Home-based HIV testing and counseling in rural and urban Kenyan communities                                                                               | High     | Prospective, large trial; no control group                             | High     | 24,450 | High     | Few exclusions, home to home; inclusive of most members in general population; rural and urban setting                           | High     |
| Daniels (2017) | Shout-It-Now: A Mobile HCT Model Employing Technology and Edutainment in South Africa                                                                     | High     | Prospective, large trial; no control group                             | High     | 72,220 | High     | Few exclusions, home to home; inclusive of most members in general population; rural and urban setting                           | High     |
| Darbes (2019)  | Results of a couples-based randomized controlled trial aimed to increase testing for HIV                                                                  | High     | Clearly described design and methods; specific inclusion criteria; RCT | Low      | 334    | Low      | Volunteers, and unmarried couples in long term relationships; many eligibility requirements                                      | Moderate |
| DeTolly (2012) | Investigation into the use of short message services to expand uptake of human immunodeficiency virus testing, and whether content and dosage have impact | High     | Clearly described design and methods; specific inclusion criteria; RCT | Moderate | 2,533  | Low      | Individuals who participated in mobile-based radio and TV competitions; randomly selected phone numbers                          | Moderate |
| Do (2014)      | Impacts of four communication programs on HIV testing behavior in South Africa                                                                            | Moderate | Detailed and justification of study design and analysis                | High     | 6,004  | Moderate | Multistage cluster sampling from 2012 National AIDS Communication Survey; Effect visible in households with access to mass media | Moderate |
| Doherty (2013) | Effect of home-based HIV counselling and testing intervention in rural South Africa: cluster randomized trial                                             | High     | Clearly described design and methods; specific inclusion criteria; RCT | Moderate | 4,154  | Moderate | Some loss to follow-up; representative of average member in a real-world community setting                                       | Moderate |

|                            |                                                                                                                                                                 |          |                                                                                      |          |                                      |          |                                                                                                                                          |          |
|----------------------------|-----------------------------------------------------------------------------------------------------------------------------------------------------------------|----------|--------------------------------------------------------------------------------------|----------|--------------------------------------|----------|------------------------------------------------------------------------------------------------------------------------------------------|----------|
| Dube (2012)                | Implementing early infant diagnosis of HIV infection at the primary care level: experiences and challenges in Malawi                                            | Moderate | Prospective cohort without control; no pre-intervention data detailed study protocol | Moderate | 1,214                                | Moderate | Infants of HIV+ mothers; rural and urban setting; No major exclusion criteria; high rates of loss to follow up                           | Moderate |
| Ekouevi (2012)             | Feasibility and acceptability of rapid HIV screening in a labor ward in Togo                                                                                    | Low      | Prospective cohort without control; no pre-intervention data                         | Moderate | 508                                  | Moderate | Single center; pregnant women admitted for labor                                                                                         | Moderate |
| Ezeanolue (2015)           | Effect of a congregation-based intervention on uptake of HIV testing and linkage to care in pregnant women in Nigeria (Baby Shower): a cluster randomized trial | High     | Clearly described design and methods; specific inclusion criteria; RCT               | Moderate | 3,002                                | High     | Pregnant women; No major exclusion criteria. Must attend church, but 90% of population attends                                           | Moderate |
| Ferrand (2016)             | Implementation and Operational Research: The Effectiveness of Routine Opt-Out HIV Testing for Children in Harare, Zimbabwe                                      | Moderate | Pre-/post-intervention design.                                                       | High     | 10,673                               | High     | Some exclusion criteria, children aged 6–15 years attending primary health care clinic for any reason                                    | High     |
| Finocchiaro-Kessler (2015) | Lessons learned from implementing the HIV infant tracking system (HITSytem): A web-based intervention to improve early infant diagnosis in Kenya                | Moderate | Control data limited; pre-/post-intervention                                         | Moderate | estimated 2,625                      | Moderate | Real world data, limited description of infants included; mother-infant pairs who enroll in EID at facilities; no significant exclusions | Moderate |
| Flick (2019)               | The HIV diagnostic assistant: early findings from a novel HIV testing cadre in Malawi                                                                           | Moderate | Pre-/post-implementation design. Routinely collected data.                           | High     | 457 facilities received intervention | Moderate | Real world data, limited description of testers; adults testing for HIV                                                                  | Moderate |
| Floyd (2018)               | Towards 90-90: Findings after two years of the HPTN 071 (PopART) cluster-randomized trial of a universal testing-and-                                           | Moderate | Subset of large RCT; no control                                                      | High     | 120,272                              | High     | ages 15+, no major exclusions, 2 countries, multiple centers                                                                             | High     |



|                  |                                                                                                                                                       |          |                                                                                 |          |                               |          |                                                                                                                                                                             |          |
|------------------|-------------------------------------------------------------------------------------------------------------------------------------------------------|----------|---------------------------------------------------------------------------------|----------|-------------------------------|----------|-----------------------------------------------------------------------------------------------------------------------------------------------------------------------------|----------|
|                  | treatment intervention in Zambia                                                                                                                      |          |                                                                                 |          |                               |          |                                                                                                                                                                             |          |
| Fylkesnes (2013) | Strong effects of home-based voluntary HIV counselling and testing on acceptance and equity: A cluster randomized trial in Zambia                     | High     | Clearly described design and methods; specific inclusion criteria; Cluster RCT  | Moderate | 1,702                         | High     | All households included, no major restrictions; several rural settings, men & women aged 16+                                                                                | High     |
| George (2018)    | Costing analysis of an SMS-based intervention to promote HIV self-testing amongst truckers and sex workers in Kenya                                   | High     | Clearly described design and methods; specific inclusion criteria; RCT          | Moderate | 2,262 truckers and 2,196 FSWs | Low      | Needed to be registered by North Star clinics, valid phone number listed; male truckers & female sex workers registered in EHR system of particular health service provider | Moderate |
| Gichangi (2018)  | Impact of HIV self-test distribution to male partners of ANC clients: results of a randomized controlled trial in Kenya                               | High     | Clearly described design and methods; specific inclusion criteria; RCT          | Moderate | 1,410                         | Moderate | Pregnant women attending ANC for first time; exclusion on basis of concern for IPV                                                                                          | Moderate |
| Girault (2015)   | Piloting a Social Networks Strategy to Increase HIV Testing and Counseling Among Men Who Have Sex with Men in Greater Accra and Ashanti Region, Ghana | Low      | Prospective cohort without control; possible selection bias in seed recruitment | Low      | 166                           | Low      | Seeds were hand-selected; no descriptive or demographic variables of participants                                                                                           | Low      |
| Golden (2018)    | HIV retesting in pregnant women in South Africa: Outcomes of a quality improvement project targeting health systems' weaknesses                       | Moderate | Quality Improvement Project; comparison group                                   | High     | 16 facilities                 | Moderate | Real world data, minimal information about testers                                                                                                                          | Moderate |

|                 |                                                                                                                                                                                                                                                                   |          |                                                                               |          |         |      |                                                                                                                                  |          |
|-----------------|-------------------------------------------------------------------------------------------------------------------------------------------------------------------------------------------------------------------------------------------------------------------|----------|-------------------------------------------------------------------------------|----------|---------|------|----------------------------------------------------------------------------------------------------------------------------------|----------|
| Govender (2018) | Effects of a Short Message Service (SMS) Intervention on Reduction of HIV Risk Behaviors and Improving HIV Testing Rates Among Populations located near Roadside Wellness Clinics: A Cluster Randomized Controlled Trial in South Africa, Zimbabwe and Mozambique | High     | Clearly described design and RCT; specific inclusion criteria; Cluster RCT    | Moderate | 1,783   | Low  | Many eligibility requirements; must have access to phone; multiple countries                                                     | Moderate |
| Hansoti (2018)  | HIV testing in a South African Emergency Department: A missed opportunity                                                                                                                                                                                         | Low      | Prospective cohort without control; possible bias in participants approached  | Moderate | 2,355   | Low  | Minimal exclusion criteria, however only 24.6% approached by study staff; few exclusion criteria, single center, ED patients 18+ | Low      |
| Hayes (2017)    | A universal testing and treatment intervention to improve HIV control: One-year results from intervention communities in Zambia in the HPTN 071 (PopART) cluster-randomized trial                                                                                 | Moderate | Subset of large RCT; no control here                                          | High     | 121,130 | High | General population; Minimal exclusion criteria; 2 countries, multiple centers                                                    | High     |
| Hector (2018)   | Acceptability and performance of a directly assisted oral HIV self-testing intervention in adolescents in rural Mozambique                                                                                                                                        | Moderate | Cohort without comparison group; well described protocol with sound rationale | Low      | 496     | Low  | Adolescents aged 16-20 recruited at schools; one center in rural setting                                                         | Low      |
| Henley (2013)   | Scale-Up and Case-Finding Effectiveness of an HIV Partner Services Program in Cameroon: An Innovative HIV Prevention Intervention                                                                                                                                 | Moderate | Prospective program evaluation; no controls                                   | Moderate | 1607    | Low  | Real world data, no information about number of HIV+ individuals offered partner services                                        | Moderate |

|                  |                                                                                                                                                                                                     |          |                                                                                                                           |          |              |          |                                                                                                                               |          |
|------------------|-----------------------------------------------------------------------------------------------------------------------------------------------------------------------------------------------------|----------|---------------------------------------------------------------------------------------------------------------------------|----------|--------------|----------|-------------------------------------------------------------------------------------------------------------------------------|----------|
|                  | for Developing Countries                                                                                                                                                                            |          |                                                                                                                           |          |              |          |                                                                                                                               |          |
| Herce (2018)     | Achieving the first 90 for key populations in sub-Saharan Africa through venue-based outreach: challenges and opportunities for HIV prevention based on PLACE study findings from Malawi and Angola | Moderate | Cohort without comparison group; good rationale; methods well-described; protocol adapted to each country's local context | Moderate | 1,924        | Moderate | real world setting; several rural and urban venues, 2 counties, MSM, FSW, TGW                                                 | Moderate |
| Hewett (2016)    | Randomized evaluation and cost-effectiveness of HIV and sexual and reproductive health service referral and linkage models in Zambia                                                                | High     | Clearly described design and methods; specific inclusion criteria; RCT                                                    | Moderate | 3,963        | Low      | Multiple eligibility criteria, patients accessing family planning, HIV testing and counseling, and male circumcision services | Moderate |
| Hu (2018)        | The impact of lay counselors on HIV testing rates: quasi-experimental evidence from lay counselor redeployment in KwaZulu-Natal, South Africa                                                       | Low      | monthly data after pre-/post- loss of counselors                                                                          | High     | 24,526 tests | Moderate | Real world data, little information about testers or tests offered, peri-urban & urban; multiple centers                      | Moderate |
| Ijadunola (2011) | Provider-initiated (Opt-out) HIV testing and counselling in a group of university students in Ile-Ife, Nigeria                                                                                      | Low      | Prospective study; no control group; 2-week period of serial recruitment and data collection                              | Low      | 252          | Moderate | Students presenting to university clinic, serially recruited, minimal eligibility criteria                                    | Low      |
| Jefferys (2015)  | Official invitation letters to promote male partner attendance and couple voluntary HIV counselling and testing in antenatal care: an implementation study                                          | Moderate | Prospective study, provides reasoning for study site selection, no control group                                          | Low      | 318          | Moderate | Pregnant women attending ANC for the first time, minimal exclusion criteria; multiple sites                                   | Moderate |

|                     |                                                                                                                                                         |          |                                                                                        |          |        |          |                                                                                      |          |
|---------------------|---------------------------------------------------------------------------------------------------------------------------------------------------------|----------|----------------------------------------------------------------------------------------|----------|--------|----------|--------------------------------------------------------------------------------------|----------|
|                     | in Mbeya Region, Tanzania                                                                                                                               |          |                                                                                        |          |        |          |                                                                                      |          |
| Jobson (2019)       | Bridging the gap: reaching men for HIV testing through religious congregations in South Africa                                                          | Low      | routine program data; no control group; possible bias in participants attending church | Moderate | 1,971  | Moderate | Male members who attended church services on designated HTS campaign days            | Moderate |
| Joseph Davey (2019) | HIV positivity and referral to treatment following testing of partners and children of PLHIV index patients in public sector facilities in South Africa | Moderate | programmatic data, no control group; convenience sampling                              | High     | 16,033 | Moderate | Real world data, limited description of testers included; index patients             | Moderate |
| Jubilee (2019)      | HIV index testing to improve HIV positivity rate and linkage to care and treatment of sexual partners, adolescents and children of PLHIV in Lesotho     | Moderate | Prospective study, provided reasoning for study site selection, no control group       | High     | 14,986 | Moderate | Some health facilities not included for finding index patients                       | Moderate |
| Jurgensen (2013)    | The seven Cs of the high acceptability of home-based VCT: results from a mixed methods approach in Zambia                                               | Moderate | Subset of large cluster RCT                                                            | Moderate | 1,220  | Moderate | Some loss to follow-up; real-world setting; adults (18+), minimal exclusion          | Moderate |
| Kababu (2018)       | Use of a counsellor supported disclosure model to improve the uptake of couple HIV testing and counselling in Kenya: a quasi-experimental study         | Moderate | Pre/post design with intervention and comparison arm                                   | Low      | 276    | Low      | Many eligibility criteria                                                            | Low      |
| Kahabuka (2017)     | Addressing the first 90: a highly effective partner notification approach reaches previously undiagnosed                                                | Moderate | Hospitals selected for high test volume, prospective, no control; well described       | Low      | 438    | Moderate | 40.3% contacted did not enroll in study, eligibility criteria not clearly described; | Moderate |

|                          |                                                                                                                                                                         |          |                                                                        |          |        |          |                                                                                                                                          |          |
|--------------------------|-------------------------------------------------------------------------------------------------------------------------------------------------------------------------|----------|------------------------------------------------------------------------|----------|--------|----------|------------------------------------------------------------------------------------------------------------------------------------------|----------|
|                          | sexual partners in Tanzania                                                                                                                                             |          |                                                                        |          |        |          | real-world data; index patients                                                                                                          |          |
| Katbi (2018)             | Effect of clients Strategic Index Case Testing on community-based detection of HIV infections (STRICT study)                                                            | Moderate | Prospective study without control                                      | Moderate | 888    | Moderate | 68.3% agreed to participate; minimal exclusions; real-world data, index patients                                                         | Moderate |
| Kelvin (2018)            | Offering self-administered oral HIV testing to truck drivers in Kenya to increase testing: a randomized controlled trial                                                | High     | Clearly described design and methods; specific inclusion criteria; RCT | Low      | 305    | Low      | Truck drivers recruited from clinics, needed cell phone to receive payment; extensive exclusion criteria                                 | Moderate |
| Kelvin (2019) A          | A randomized controlled trial to increase HIV testing demand among female sex workers in Kenya through announcing the availability of HIV self-testing via text message | High     | Clearly described design and methods; specific inclusion criteria; RCT | Moderate | 2,196  | Low      | Registered clinic patients, valid phone number on record; extensive exclusion criteria                                                   | Moderate |
| Kelvin (2019) B          | Announcing the availability of oral HIV self-test kits via text message to increase HIV testing among hard-to-reach truckers in Kenya: A randomized controlled trial    | High     | Clearly described design and methods; specific inclusion criteria; RCT | Moderate | 2,262  | Low      | truck drivers; extensive exclusion criteria, required valid cell phone number, registered clinic patients                                | Moderate |
| Khumalo-Sakutukwa (2008) | Project Accept (HPTN 043): a community-based intervention to reduce HIV incidence in populations at risk for HIV in sub-Saharan Africa and Thailand                     | High     | Subset of large RCT                                                    | High     | 11,655 | Moderate | Eligibility criteria and descriptions of testers not included<br>HPTN CHW utilized in outreach, counselling and testing; real world data | High     |

|                 |                                                                                                                                                        |          |                                                                                                                        |          |                                           |          |                                                                                                                          |          |
|-----------------|--------------------------------------------------------------------------------------------------------------------------------------------------------|----------|------------------------------------------------------------------------------------------------------------------------|----------|-------------------------------------------|----------|--------------------------------------------------------------------------------------------------------------------------|----------|
| Kose (2018)     | Impact of a comprehensive adolescent-focused case finding intervention on uptake of HIV testing and linkage to care among adolescents in Western Kenya | Moderate | Pre-/post-intervention design; unknown number of tests offered                                                         | High     | 139 health care facilities, 103,164 tests | Moderate | Unknown number of individuals offered tests; adolescents aged 10-19; multiple facilities; minimal eligibility criteria   | Moderate |
| Kranzer (2018)  | Economic incentives for HIV testing by adolescents in Zimbabwe: a randomized controlled trial                                                          | High     | RCT nested within household survey                                                                                     | Moderate | 2,050 households                          | High     | 1703/2050 households participated in household survey. urban; minimal eligibility criteria                               | High     |
| Labhardt (2014) | Home-based versus mobile clinic HIV testing and counseling in rural Lesotho: a cluster-randomized trial                                                | High     | Clearly described design and methods; specific inclusion criteria; RCT                                                 | Moderate | 2,562                                     | High     | Minimal exclusion criteria; urban community; real-world setting                                                          | High     |
| Labhardt (2019) | Effect and cost of two successive home visits to increase HIV testing coverage: a prospective study in Lesotho, Southern Africa                        | Moderate | Subset of large RCT; no control group                                                                                  | High     | 18,336                                    | High     | Minimal exclusion criteria, broad definition of household member, return to catch missed individuals; several households | High     |
| Lafort (2018)   | Effect of a 'diagonal' intervention on uptake of HIV and reproductive health services by female sex workers in three sub-Saharan African cities        | Moderate | pre-/post-intervention cross-sectional surveys; respondent-driven sampling; potential for selection and reporting bias | Moderate | 1,207                                     | Moderate | FSW; Respondent-driven sampling; multiple countries                                                                      | Moderate |
| Liambila (2009) | Feasibility and effectiveness of integrating provider-initiated testing and counselling within family planning services in Kenya                       | Moderate | Pre-/Post-intervention. Health facilities purposively selected                                                         | Low      | 424                                       | Low      | Family planning clients; Sequential sampling, eligibility criteria not well described                                    | Low      |

|                 |                                                                                                                                                             |          |                                                                            |          |                 |          |                                                                                                                         |          |
|-----------------|-------------------------------------------------------------------------------------------------------------------------------------------------------------|----------|----------------------------------------------------------------------------|----------|-----------------|----------|-------------------------------------------------------------------------------------------------------------------------|----------|
| Lindgren (2011) | Using mobile clinics to deliver HIV testing and other basic health services in rural Malawi                                                                 | Low      | Routine program data, no comparison                                        | High     | 38,647 contacts | Low      | Real world data, minimal information on participants and HIV testing outcomes; minimal eligibility criteria             | Moderate |
| Lippman (2017)  | Community mobilization for HIV testing uptake: results from a community randomized trial of a theory-based intervention in rural South Africa               | High     | Clearly described design and methods; specific inclusion criteria; RCT     | Moderate | 1,181           | Moderate | Random sample from census data, moderate eligibility criteria; real-world setting, need to be resident for 1 year +     | Moderate |
| Lugada (2010) A | Comparison of home and clinic-based HIV testing among household members of persons taking antiretroviral therapy in Uganda: results from a randomized trial | High     | RCT- sub study of a large RCT for homebased ART                            | High     | 7,184           | Moderate | Household members of larger trial's participants, all household members were eligible regardless of age or relationship | High     |
| Lugada (2010) B | Rapid implementation of an integrated large-scale HIV counseling and testing, malaria, and diarrhea prevention campaign in rural Kenya                      | High     | Large implementation study; well described methods                         | High     | 51,178          | High     | Persons aged 15-49; used census data to estimate population size. Minimal eligibility requirements;                     | High     |
| Lyatuu (2018)   | Engaging community leaders to improve male partner participation in the prevention of mother-to-child transmission of HIV in Dar es Salaam, Tanzania        | High     | Selected facilities for intervention, other facilities as comparison group | High     | 35,822          | Moderate | Real world data, little information about testers; purposive selection of intervention sites with favorable conditions  | High     |
| Lyons (2019)    | Use and acceptability of HIV self-testing among first-time testers at risk for HIV in Senegal                                                               | Moderate | Pilot study, no control group                                              | Moderate | 1,839           | Low      | Convenience sampling                                                                                                    | Moderate |

|                |                                                                                                                                                                                |          |                                                                        |          |                           |          |                                                                                                                                               |          |
|----------------|--------------------------------------------------------------------------------------------------------------------------------------------------------------------------------|----------|------------------------------------------------------------------------|----------|---------------------------|----------|-----------------------------------------------------------------------------------------------------------------------------------------------|----------|
| Mabuto (2014)  | Four models of HIV counseling and testing: utilization and test results in South Africa                                                                                        | Low      | Program data, retrospective                                            | High     | 121,032                   | Moderate | Real world data, little information on testers, no information on number offered tests; minimal eligibility criteria; rural and urban setting | Moderate |
| Madsen (2019)  | Acceptance and feasibility of partner notification to HIV infected individuals in Guinea-Bissau                                                                                | Low      | Prospective feasibility study, no control                              | Moderate | 547                       | Moderate | Clinic patients 15+ with HIV; single center                                                                                                   | Moderate |
| Mahachi (2019) | Sustained high HIV case-finding through index testing and partner notification services: experiences from three provinces in Zimbabwe                                          | Low      | Retrospective project monitoring data                                  | High     | 55,149                    | High     | Real world data, includes information about number accepting partner notification; index cases; rural and urban populations                   | Moderate |
| Mandala (2019) | HIV retesting of HIV-negative pregnant women in the context of prevention of mother-to-child transmission of HIV in primary health centers in rural Zambia: what did we learn? | Moderate | Implementation, routinely collected data; 10 facilities                | High     | 16,838                    | High     | pregnant women & their infants, previously tested HIV negative, 10 clinics, minimal eligibility requirements                                  | High     |
| Marwa (2019)   | The effects of HIV self-testing kits in increasing uptake of male partner testing among pregnant women attending antenatal clinics in Kenya: a randomized controlled trial     | High     | Clearly described design and methods; specific inclusion criteria; RCT | Moderate | 1,410 women and 1,033 men | Moderate | 71% eligible. Some exclusion criteria;                                                                                                        | Moderate |
| Masyuko (2019) | Index participant characteristics and HIV assisted partner services efficacy in Kenya: results of a cluster randomized trial                                                   | High     | Clearly described design and methods; specific inclusion criteria; RCT | Moderate | 1,286                     | Moderate | PLHIV; some eligibility criteria                                                                                                              | Moderate |



|                  |                                                                                                                                                                                                    |          |                                                                        |          |                       |          |                                                                                                                                                                                                     |          |
|------------------|----------------------------------------------------------------------------------------------------------------------------------------------------------------------------------------------------|----------|------------------------------------------------------------------------|----------|-----------------------|----------|-----------------------------------------------------------------------------------------------------------------------------------------------------------------------------------------------------|----------|
| McGovern (2016)  | Do gifts increase consent to home-based HIV testing? A difference-in-differences study in rural KwaZulu-Natal, South Africa                                                                        | Moderate | Well-explained, control group, non-randomized                          | High     | 18,478                | High     | uses census data, includes all residents 15+ years old in analysis; rural setting                                                                                                                   | High     |
| McNaghten (2015) | Implementation and operational research: Strengthening HIV Test Access and Treatment Uptake Study (Project STATUS): a randomized trial of HIV testing and counseling interventions                 | High     | Clearly described design and methods; specific inclusion criteria; RCT | High     | 35,853 (age eligible) | Moderate | Clinic patients, Ages 18-49 ; must not have tested for HIV (regardless of result) in the past year                                                                                                  | High     |
| Mohlala (2011)   | The forgotten half of the equation: randomized controlled trial of a male invitation to attend couple voluntary counselling and testing                                                            | High     | Clearly described design and methods; specific inclusion criteria; RCT | Moderate | 1,000                 | Low      | Single facility, not randomly selected                                                                                                                                                              | Moderate |
| Moore (2019)     | Comparing youth-friendly health services to the standard of care through "Girl Power-Malawi": a quasi-experimental cohort study                                                                    | High     | Selected 4 similar health centers and randomized. Well-described       | Moderate | 1,000                 | Moderate | female, 15-24 years old willing to participate for a year; high level of screened are eligible (1080/1109) and enrolled. Recruitment by community outreach, participant referral, and self-referral | Moderate |
| Muhula (2016)    | Uptake and linkage into care over one year of providing HIV testing and counselling through community and health facility testing modalities in urban informal settlement of Kibera, Nairobi Kenya | Low      | Retrospective program data                                             | High     | 18,591                | Moderate | Real world data, little information on testers or on number offered tests                                                                                                                           | Moderate |

|                       |                                                                                                                                                                   |          |                                                                                               |          |                                      |          |                                                                                                                                        |          |
|-----------------------|-------------------------------------------------------------------------------------------------------------------------------------------------------------------|----------|-----------------------------------------------------------------------------------------------|----------|--------------------------------------|----------|----------------------------------------------------------------------------------------------------------------------------------------|----------|
| Mulubwa (2018)        | Community based distribution of oral HIV self-testing kits in Zambia: a cluster-randomized trial nested in four HPTN 071 (PopART) intervention communities        | High     | Clearly described design and methods; specific inclusion criteria; nested cluster RCT         | High     | 26,973                               | High     | all adolescents and adults aged 16+, minimal eligibility criteria                                                                      | High     |
| Musarandega (2018)    | Scaling up pediatric HIV testing by incorporating provider-initiated HIV testing into all child health services in Hurungwe District, Zimbabwe                    | Moderate | Before and after study and data; routine program data                                         | High     | 12,556                               | High     | 33 health facilities; children 0-5; real-world data; some without testing information                                                  | High     |
| Mwenda (2018)         | Significant patient impact observed upon implementation of Point-Of-Care early infant diagnosis technologies in an observational study in Malawi                  | Moderate | Retrospective pre-intervention, prospective post-intervention; infants included consecutively | Moderate | 1752                                 | Moderate | Implemented in 7 facilities, sequential recruitment; infants suspected of HIV exposure                                                 | Moderate |
| Ndondoki (2013)       | Universal HIV screening at postnatal points of care: which public health approach for early infant diagnosis in Côte d'Ivoire?                                    | Low      | Intervention with no control or pre-intervention data                                         | Moderate | 3,013 children born to 2,986 mothers | Moderate | children aged 6-26 weeks attending postnatal point of care in 3 community health centers; several parents declined consent for infants | Moderate |
| Ndori-Mharadze (2018) | Changes in engagement in HIV prevention and care services among female sex workers during intensified community mobilization in 3 sites in Zimbabwe, 2011 to 2015 | Moderate | Routine clinical data; respondent-driven sampling surveys                                     | Moderate | 915                                  | Low      | respondent-driven sampling; FSW aged 18+ working at the study site and reported exchanging sex for money in the past 30 days           | Moderate |

|                             |                                                                                                                                                                                 |          |                                                                                        |          |                                                       |          |                                                                                                                            |          |
|-----------------------------|---------------------------------------------------------------------------------------------------------------------------------------------------------------------------------|----------|----------------------------------------------------------------------------------------|----------|-------------------------------------------------------|----------|----------------------------------------------------------------------------------------------------------------------------|----------|
| Njuguna (2018)              | Financial incentives to increase pediatric HIV testing: a randomized trial                                                                                                      | High     | Clearly described design and methods; specific inclusion criteria; RCT                 | Low      | 452 Caregivers                                        | Moderate | 19 facilities, goal of screening every adult; HIV-positive adult in HIV care with children aged 0-12 of unknown HIV status | Moderate |
| Nsirim (2018)               | Effectiveness of provider-initiated testing and counseling in increasing HIV testing and counselling utilization and HIV detection rates in Ebonyi State, South-Eastern Nigeria | Moderate | Prospective pre-/post-intervention design without control                              | High     | Pre-intervention: 50,898<br>post-intervention: 22,153 | Moderate | Clinic patients and outreach in public places; several facilities; real-world setting                                      | Moderate |
| Nuwagaba-Biribonwoha (2010) | Introducing a multi-site program for early diagnosis of HIV infection among HIV-exposed infants in Tanzania                                                                     | Low      | Pilot program, no pre-intervention data                                                | Moderate | 510                                                   | Moderate | 4 health facilities, real-world setting, HIV-exposed infants                                                               | Moderate |
| Nuwaha (2012)               | Effect of home-based HIV counselling and testing on stigma and risky sexual behaviors': serial cross-sectional studies in Uganda                                                | Moderate | Pre-/postintervention; random selection                                                | Moderate | 2964                                                  | High     | Randomly selected adults from 30 villages, all households eligible                                                         | Moderate |
| Odeny (2018)                | Participation in a clinical trial of a text messaging intervention is associated with increased infant HIV testing: A parallel cohort randomized controlled trial               | High     | Clearly described design and methods; specific inclusion criteria; parallel cohort RCT | Moderate | 1,115                                                 | Low      | Only 35% of those screened are eligible; women required access to mobile phone, among other eligibility requirements       | Moderate |
| Ogbo (2017)                 | Assessment of provider-initiated HIV screening in Nigeria with sub-Saharan African comparison                                                                                   | Low      | Ineffective comparison of both VCT and PITC approaches and group; feasibility study    | Low      | 212                                                   | Low      | One facility, out of pocket expense; all patients aged 13+                                                                 | Low      |

|                      |                                                                                                                                                          |          |                                                                                           |          |        |          |                                                                                                     |          |
|----------------------|----------------------------------------------------------------------------------------------------------------------------------------------------------|----------|-------------------------------------------------------------------------------------------|----------|--------|----------|-----------------------------------------------------------------------------------------------------|----------|
| Oldenburg (2018)     | Effect of HIV self-testing on the number of sexual partners among female sex workers in Zambia                                                           | High     | Clearly described design and methods; specific inclusion criteria; cluster RCT            | Moderate | 965    | Low      | Peer recruited; some eligibility criteria for FSW                                                   | Moderate |
| Orne-Gliemann (2013) | Increasing HIV testing among male partners                                                                                                               | High     | Clearly described design and methods; specific inclusion criteria; RCT                    | Low      | 484    | Moderate | 4 urban health centers; women attending first prenatal care visit; minor eligibility criteria       | Moderate |
| Ortblad (2017)       | Direct provision versus facility collection of HIV self-tests among female sex workers in Uganda: A cluster-randomized controlled health systems trial   | High     | Clearly described design and methods; specific inclusion criteria; RCT                    | Moderate | 960    | Low      | FSW recruited by peers; real world setting; must plan to continue work as FSW for at least 4 months | Moderate |
| Parker (2015)        | Feasibility and effectiveness of two community-based HIV testing models in rural Swaziland                                                               | Moderate | Routine program data, provides eligible number of participants for one method; no control | High     | 12,269 | Low      | Only 26% of houses visited - non-randomized; rural setting; all individuals over 18 months eligible | Moderate |
| Rollins (2009)       | Universal HIV testing of infants at immunization clinics: an acceptable and feasible approach for early infant diagnosis in high HIV prevalence settings | Low      | observational cohort with intervention; no control or comparison                          | Moderate | 646    | Moderate | Infants attending any of the first 3 immunizations                                                  | Moderate |
| Rosenberg (2016)     | Recruiting the social contacts of patients with STI for HIV screening in Lilongwe, Malawi: process evaluation and assessment of acceptability            | Moderate | Random recruitment of seeds; 3 groups with matched controls                               | Low      | 135    | Moderate | Seeds randomly selected from clinic roster; participants peer recruited by STI patients             | Moderate |

|                             |                                                                                                                                                                                                  |          |                                                                                                 |          |           |          |                                                                                                                  |          |
|-----------------------------|--------------------------------------------------------------------------------------------------------------------------------------------------------------------------------------------------|----------|-------------------------------------------------------------------------------------------------|----------|-----------|----------|------------------------------------------------------------------------------------------------------------------|----------|
| Sarna (2019)                | Cell phone counseling improves retention of mothers with HIV infection in care and infant HIV testing in Kisumu, Kenya: a randomized controlled study                                            | High     | RCT                                                                                             | Low      | 404       | low      | 404/2176 pregnant women with HIV that were screened participated.; high refusal rate; single center              | Moderate |
| SEARCH Collaboration (2017) | Evaluating the feasibility and uptake of a community-led HIV testing and multi-disease health campaign in rural Uganda                                                                           | Low      | Feasibility study, no controls                                                                  | Moderate | 3,016     | High     | Performed census; single center; real world data                                                                 | Moderate |
| Shah (2018)                 | A pilot study of "peer navigators" to promote uptake of HIV testing, care and treatment among street-connected children and youth in Eldoret, Kenya                                              | Moderate | Pilot study; routinely collected clinical care data from the PN; no control or comparison group | Moderate | 781       | Moderate | Young persons who spend work or live on the streets; peer recruitment                                            | Moderate |
| Shamu (2019)                | Comparison of community-based HIV counselling and testing (CBCT) through index client tracing and other modalities: Outcomes in 13 South African high HIV prevalence districts by gender and age | Moderate | Retrospective program data; large cohort                                                        | High     | 1,282,369 | Moderate | Real world data, unknown number offered testing, limited information about testers; minimal eligibility criteria | Moderate |
| Shamu (2018)                | Social franchising of community-based HIV testing and linkage to HIV care and treatment services: an evaluation of a pilot study in Tshwane, South Africa                                        | Moderate | Pilot study; Cohort with comparison; based on routinely collected data (some incomplete)        | High     | 84,556    | Moderate | Real world data, little information on testers or number offered testing                                         | Moderate |
| Shanaube (2017) A           | Community intervention improves knowledge of HIV status of adolescents in Zambia: findings from                                                                                                  | Moderate | Subset of large RCT; no comparison group                                                        | High     | 15,465    | High     | Enumerated eligible participants before; 2 countries, multiple centers                                           | High     |

|                   |                                                                                                                                                                                        |          |                                                                                               |          |                                    |          |                                                                                                       |          |
|-------------------|----------------------------------------------------------------------------------------------------------------------------------------------------------------------------------------|----------|-----------------------------------------------------------------------------------------------|----------|------------------------------------|----------|-------------------------------------------------------------------------------------------------------|----------|
|                   | HPTN 071-PopART for youth study                                                                                                                                                        |          |                                                                                               |          |                                    |          |                                                                                                       |          |
| Shanaube (2017) B | What works - reaching universal HIV testing: lessons from HPTN 071 (PopART) trial in Zambia                                                                                            | Moderate | Subset of large RCT; no comparison group                                                      | High     | 121,130                            | High     | Enumerated eligible participants before; 2 countries, multiple centers                                | High     |
| Singh (2012)      | A venue-based approach to reaching MSM, IDUs and the general population with VCT: a three-study site in Kenya                                                                          | High     | Intervention, no comparison group. Well-described methods                                     | Moderate | Total: 2,238. MSM: 262. PWID: 154. | Moderate | Venue-based, randomized sampling for interview; real world setting, all 18+                           | Moderate |
| Sutcliffe 2017    | Use of mobile phones and text messaging to decrease the turnaround time for early infant HIV diagnosis and notification in rural Zambia: an observational study                        | Low      | Pilot study, no comparison group                                                              | Low      | 419                                | Moderate | Only 30% report ever using a cell phone; rural health center contacted for mothers without cellphones | Low      |
| Tembo (2019)      | Enhancing an HIV index case testing passive referral model through a behavioral skills-building training for healthcare providers: a pre-/post-assessment in Mangochi District, Malawi | Moderate | 36 facilities received training. Pre/post intervention; monthly programmatic data abstraction | High     | 36 testing facilities              | Moderate | Multiple health facilities; real world data; little known about testers                               | Moderate |
| Theron (2010)     | Rapid intrapartum or postpartum HIV testing at a midwife obstetric unit and a district hospital in South Africa                                                                        | High     | Clearly described design and methods; specific inclusion criteria; RCT                        | Moderate | 542                                | Low      | Only 7.5% of women approached were eligible, of those, 63% consented. Two facilities                  | Moderate |

|                 |                                                                                                                                                                                                                   |          |                                                                                                                                               |          |        |          |                                                                                                                                    |          |
|-----------------|-------------------------------------------------------------------------------------------------------------------------------------------------------------------------------------------------------------------|----------|-----------------------------------------------------------------------------------------------------------------------------------------------|----------|--------|----------|------------------------------------------------------------------------------------------------------------------------------------|----------|
| Theuring (2016) | Increasing Partner Attendance in Antenatal Care and HIV Testing Services: Comparable Outcomes Using Written versus Verbal Invitations in an Urban Facility-Based Controlled Intervention Trial in Mbeya, Tanzania | High     | Subset of larger implementation study, randomized to intervention or control                                                                  | Low      | 199    | Moderate | 73% of screened were eligible. Single facility; divorced or widowed women excluded                                                 | Moderate |
| Thurman (2016)  | Promoting uptake of child HIV testing: an evaluation of the role of a home visiting program for orphans and vulnerable children in South Africa                                                                   | Moderate | Cohort receiving intervention, cohort signed up and waiting to receive intervention. Used propensity score matching to adjust for differences | Moderate | 1,324  | Low      | Enrolled in program. Noted differences between two groups; Orphans and vulnerable children; participation bias on enrollment basis | Moderate |
| Tih (2019)      | Assisted HIV partner notification services in resource-limited settings: experiences and achievements from Cameroon                                                                                               | High     | Large scale implementation study                                                                                                              | High     | 21,057 | Moderate | Unknown number offered intervention; index persons                                                                                 | High     |
| Topp (2012)     | Does provider-initiated counselling and testing (PITC) strengthen early diagnosis and treatment initiation? Results from an analysis of an urban cohort of HIV-positive patients in Lusaka, Zambia                | Moderate | Programmatic data comparing pre-/post-intervention                                                                                            | High     | 10,919 | Moderate | Real world data, PITC only certain hours, urban population; no significant exclusion                                               | Moderate |
| Truong (2019)   | Implementation of a community-based hybrid HIV testing services program as a strategy to saturate testing coverage in Western Kenya                                                                               | High     | Large scale implementation study                                                                                                              | High     | 28,885 | High     | Conducted census first; representative of average member in the community                                                          | High     |

|                     |                                                                                                                                                                  |          |                                                                                           |          |                                                             |          |                                                                                   |          |
|---------------------|------------------------------------------------------------------------------------------------------------------------------------------------------------------|----------|-------------------------------------------------------------------------------------------|----------|-------------------------------------------------------------|----------|-----------------------------------------------------------------------------------|----------|
| Tun (2018)          | Uptake of HIV self-testing and linkage to treatment among men who have sex with men (MSM) in Nigeria: A pilot program using key opinion leaders to reach MSM     | Moderate | Pilot study and post-intervention survey; HIVST uptake and test result were self-reported | Low      | 319                                                         | Moderate | MSM recruited by peers; extensive eligibility requirements; 20% lost to follow-up | Moderate |
| Uwimana (2013)      | Community-based intervention to enhance provision of integrated TB-HIV and PMTCT services in South Africa                                                        | Moderate | Pre-/Post-intervention design                                                             | Moderate | 3,584                                                       | Low      | Sampling not described; eligibility criteria not described                        | Moderate |
| van Rooyen (2013) A | High HIV testing uptake and linkage to care in a novel program of home-based HIV counseling and testing with facilitated referral in KwaZulu-Natal, South Africa | Low      | Cohort with no comparison group                                                           | Moderate | 739                                                         | High     | Census performed first, all adults eligible testing                               | Moderate |
| van Rooyen (2013) B | Mobile VCT: reaching men and young people in urban and rural South African pilot studies (NIMH Project Accept, HPTN 043)                                         | Moderate | Pilot study for larger trial; cohort without comparison                                   | Moderate | 1,015                                                       | Moderate | Minimal eligibility criteria; self-selected population                            | Moderate |
| Wall (2019)         | HIV testing and counselling couples together for affordable HIV prevention in Africa                                                                             | Moderate | Program data; large cohort                                                                | High     | 414,856                                                     | Moderate | Real world data, minimal description of testers, unknown number declined          | Moderate |
| Wanyenze (2013)     | Abbreviated HIV counselling and testing and enhanced referral to care in Uganda: a factorial randomized controlled trial                                         | High     | Clearly described design and methods; specific inclusion criteria; RCT                    | Moderate | 3,415                                                       | Moderate | 65% of screened were enrolled. Single facility. Inpatient and outpatient          | Moderate |
| Wroe (2018)         | Delivering comprehensive HIV services across the HIV care continuum: a comparative analysis of survival and progress                                             | Low      | Observational, retrospective data collection                                              | High     | Intervention group: 13 facilities. Control: 682 facilities. | High     | Real-world data, compared number tested to total population                       | Moderate |



|             |                                                                                                                                                                                                            |          |                                                                                 |          |        |          |                                                                                                 |          |
|-------------|------------------------------------------------------------------------------------------------------------------------------------------------------------------------------------------------------------|----------|---------------------------------------------------------------------------------|----------|--------|----------|-------------------------------------------------------------------------------------------------|----------|
|             | towards 90-90-90 in rural Malawi                                                                                                                                                                           |          |                                                                                 |          |        |          |                                                                                                 |          |
| Yumo (2018) | Active case finding: comparison of the acceptability, feasibility and effectiveness of targeted versus blanket provider-initiated-testing and counseling of HIV among children and adolescents in Cameroon | Low      | Cohort with comparison and data; Implementation strategy differed in 1 hospital | Moderate | 4,719  | Moderate | 3 hospitals. Parents receiving HIV care or children presenting to outpatient; minimal exclusion | Moderate |
| Yumo (2019) | Effectiveness of symptom-based diagnostic HIV testing versus targeted and blanket provider-initiated testing and counseling among children and adolescents in Cameroon                                     | Moderate | pre-and post-intervention study; 6-month intervention; clearly described        | High     | 10,534 | High     | Children of HIV+ parents; all children/adolescents seen for any medical reason in OPDs          | High     |
